# Supplementary material
Source: Springer Nature journal article supplement (https://www.springermedizin.de/resource/supplementary/12882_2012_525_MOESM1_ESM.pdf/9453748)
Supplement: MOESM1 [file 9453748]

Patients in RAMQ between Jan 1, 2001 and Dec 31, 2010  
with  $\geq 1$  dialysis-related code  
(n=31 891)

Excluded (n=19 096)

- Kidney transplant prior to chronic dialysis (n=525)
- Parathyroidectomy prior to chronic dialysis (n=69)
- Less than 3 months of follow-up (n=6731)
- Not on maintenance dialysis at 3 months (n=11 771)

Patients included in RAMQ cohort  
(n=12 795)
